CORRECTION

# Correction: Multi-methodological approach for the Quality assessment of *Senecionis scandentis* Herba (Qianliguang) in the herbal market

Hui-Lam Ngai, Xiao Yang, Adrian Jun Chu, Rachel Harper, Alice B. J. E. Jacobsen, David Tai-Wai Lau, Ho-Yin Yu, Hung-Kay Lee, Pang-Chui Shaw

## Notice of Republication

This article was republished on July 10, 2025, to correct errors in Table 1, Figure 1, and S8 File that were introduced during the publication process. Please download this article again to view the correct version. The originally published, uncorrected article and the republished, corrected articles are provided here for reference.

## Supporting information

**S1 File. Originally published, uncorrected article.**  
(PDF)

**S2 File. Republished, corrected article.**  
(PDF)

## Reference

1. Ngai H-L, Yang X, Chu AJ, Harper R, Jacobsen ABJE, Lau DT-W, et al. Multi-methodological approach for the Quality assessment of *Senecionis scandentis* Herba (Qianliguang) in the herbal market. PLoS ONE. 2022;17(4):e0267143. <https://doi.org/10.1371/journal.pone.0267143>

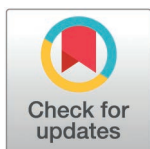

## OPEN ACCESS

**Citation:** Ngai H-L, Yang X, Chu AJ, Harper R, Jacobsen ABJE, Lau DT-W, et al. (2025) Correction: Multi-methodological approach for the Quality assessment of *Senecionis scandentis* Herba (Qianliguang) in the herbal market. PLoS One 20(7): e0329396. <https://doi.org/10.1371/journal.pone.0329396>

**Published:** July 29, 2025

**Copyright:** © 2025 Ngai et al. This is an open access article distributed under the terms of the [Creative Commons Attribution License](https://creativecommons.org/licenses/by/4.0/), which permits unrestricted use, distribution, and reproduction in any medium, provided the original author and source are credited.
